# Supplementary material for: Three-dimensional Au–MnO2 nanostructure as an agent of synergistic cancer therapy: chemo-/photodynamic and photothermal approaches
Source: Royal Society of Chemistry journal article supplement (doi:10.1039/d4dt01123f), 2024-01-01
Supplement: d4dt01123f1.pdf [file d4dt01123f1.pdf]

Supporting information

Three Dimension of Au-MnO<sub>2</sub> Nanostructure as Agent of Synergistic Cancer Therapy: Chemo-/Photodynamic and Photothermal Approaches

Siti Febtria Asrini Sugito<sup>a,d</sup>, Aswandi Wibrianto<sup>a,d</sup>, Jia-yaw Chang<sup>b</sup>, Mochamad Zakki Fahmi<sup>a,d\*</sup>, Siti Qomariyah Khairunisa<sup>c</sup>, Satya Candra Wibawa Sakti<sup>a,d</sup>, Musbahu Adam Ahmad<sup>d</sup>, Lee Hwei Voon<sup>e</sup>, and Yatim Lailun Nikmah<sup>f</sup>

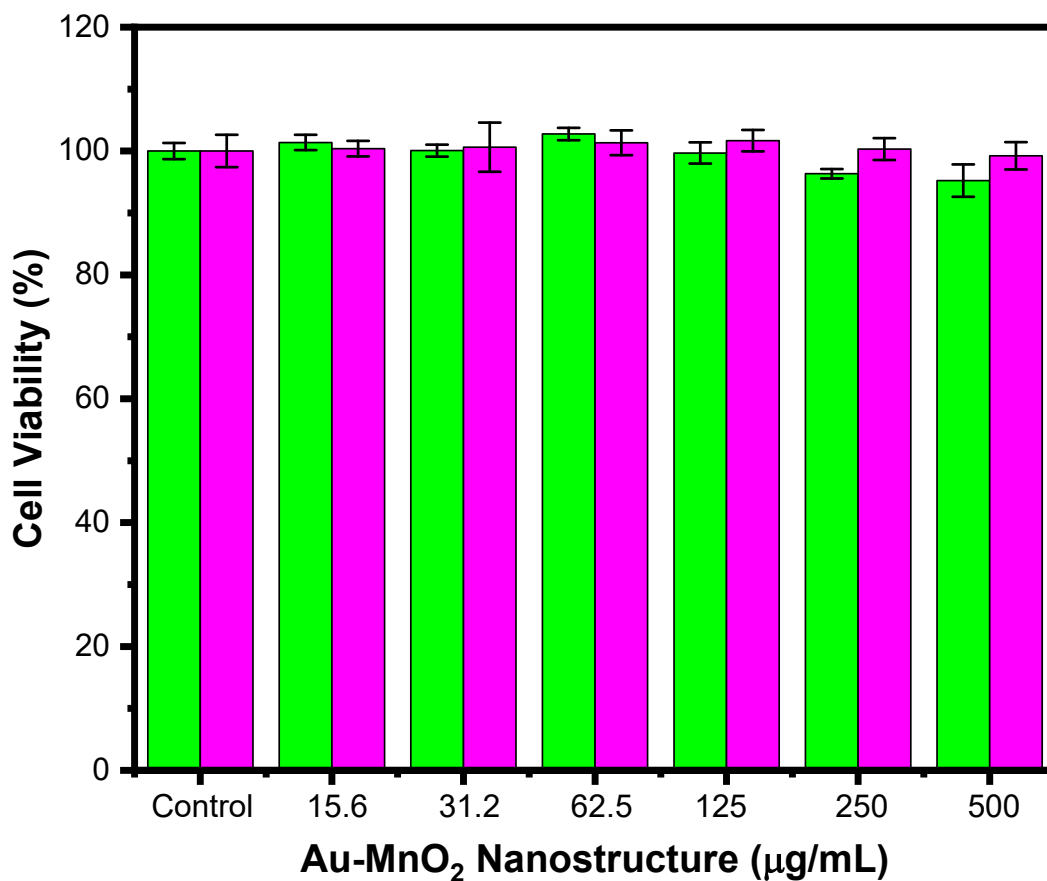

**Figure S1.** Cell viability of HFB cell using WST-1 assay after 24 h (green) and 72 h (purple) incubated with varied concentration of Au-MnO<sub>2</sub> nanostructures. All data represent as mean  $\pm$ SD (n=3).

**Table S1.** XPS data analysis from Au-MnO<sub>2</sub> spectra provides chemical bond, specific binding energies, FWHM, area, and % concentration of each elements.

| Name | Chemical Bond | Binding Energy (eV) | FWHM | Area | %    |
|------|---------------|---------------------|------|------|------|
| C 1s | C=C           | 284,6               | 1,66 | 1255 | 25,8 |
|      | C-O-C         | 286,7               | 2,13 | 1335 | 27,4 |
|      | C=O=C         | 288,9               | 2,13 | 1737 | 35,7 |
|      | C-O=C         | 290,7               | 2,19 | 543  | 11,1 |
| O 1s | O-Mn-O        | 529,6               | 1,47 | 5418 | 32,8 |

|                  |                  |       |      |       |      |
|------------------|------------------|-------|------|-------|------|
|                  | C-OH atau O=C-OH | 530,9 | 1,52 | 6612  | 40,1 |
|                  | C=O              | 532,3 | 2,44 | 4471  | 27,1 |
| <b>Mn 2p 1/2</b> | Mn-O             | 641,3 | 2,34 | 19606 | 41,8 |
|                  | O-Mn-O           | 642,9 | 3,11 | 11767 | 25,1 |
| <b>Mn 2p 3/2</b> | Mn-O             | 652,6 | 2,34 | 8391  | 17,9 |
|                  | O-Mn-O           | 654,1 | 2,64 | 7152  | 15,2 |
| <b>Au 4f 7/2</b> | -                | 83,4  | 2,85 | 1272  | 61,7 |
| <b>Au 4f 5/2</b> | -                | 88,8  | 2,61 | 789   | 38,3 |

<sup>a</sup> Department of Chemistry, Universitas Airlangga, Surabaya 60115, Indonesia

<sup>b</sup> Department of Chemical Engineering, National Taiwan University of Science and Technology, Taipei City, Taiwan 106

<sup>c</sup> Institute of Tropical Disease, Indonesia-Japan Collaborative Research Center for Emerging and Re-emerging Infectious Diseases, Airlangga University, Surabaya 60115, Indonesia

<sup>d</sup> Supramodification Nano-micro Engineering Research Group, Universitas Airlangga, Surabaya 60115, Indonesia

<sup>e</sup> Nanotechnology Catalysis and Research Centre, University of Malaya, Kuala Lumpur 50603, Malaysia.

<sup>f</sup> Department of Chemistry, Faculty of Natural Science, Sepuluh Nopember Institute of Technology, Keputih, Sukolilo, Surabaya 60111, Indonesia.

\* Email: [m.zakki.fahmi@fst.unair.ac.id](mailto:m.zakki.fahmi@fst.unair.ac.id); Tel/Fax: 62-31-5922427

Electronic Supplementary Information (ESI) available: [cytotoxicity data on HFB cells, XPS Data analysis, Comparison of HeLa cell viability test, t-test]. See DOI: 10.1039/x0xx00000x

**Table S2.** Comparison of the viability of HeLa cells upon laser treatment and without laser exposure of Au-MnO<sub>2</sub>-nanostructure

| Au-MnO <sub>2</sub> Nanostructure (ppm) | Control (% Viability Cell) | PTT (% Viability Cell) |
|-----------------------------------------|----------------------------|------------------------|
| 0                                       | 100.000                    | 99.000                 |
| 16                                      | 92.561                     | 98.782                 |
| 31.2                                    | 92.857                     | 66.396                 |
| 62.5                                    | 94.332                     | 56.294                 |
| 125                                     | 92.739                     | 50.152                 |
| 250                                     | 87.780                     | 41.777                 |
| 500                                     | 90.082                     | 38.122                 |

**Table S3.** t-Test: Two-Sample Assuming Equal Variances

|                              | Control  | PTT      |
|------------------------------|----------|----------|
| Mean                         | 91.72516 | 58.58714 |
| Variance                     | 5.613772 | 490.8815 |
| Observations                 | 6        | 6        |
| Pooled Variance              | 248.2476 |          |
| Hypothesized Mean Difference | 0        |          |
| df                           | 10       |          |
| t Stat                       | 3.642877 |          |
| P(T<=t) one-tail             | 0.002258 |          |
| t Critical one-tail          | 1.812461 |          |
| P(T<=t) two-tail             | 0.004515 |          |
| t Critical two-tail          | 2.228139 |          |
